# Supplementary material for: Between Lake Baikal and the Baltic Sea: genomic history of the gateway to Europe
Source: PubMed Central journal article supplement (PMC5751809; doi:10.1186/s12863-017-0578-3), 2017-12-28

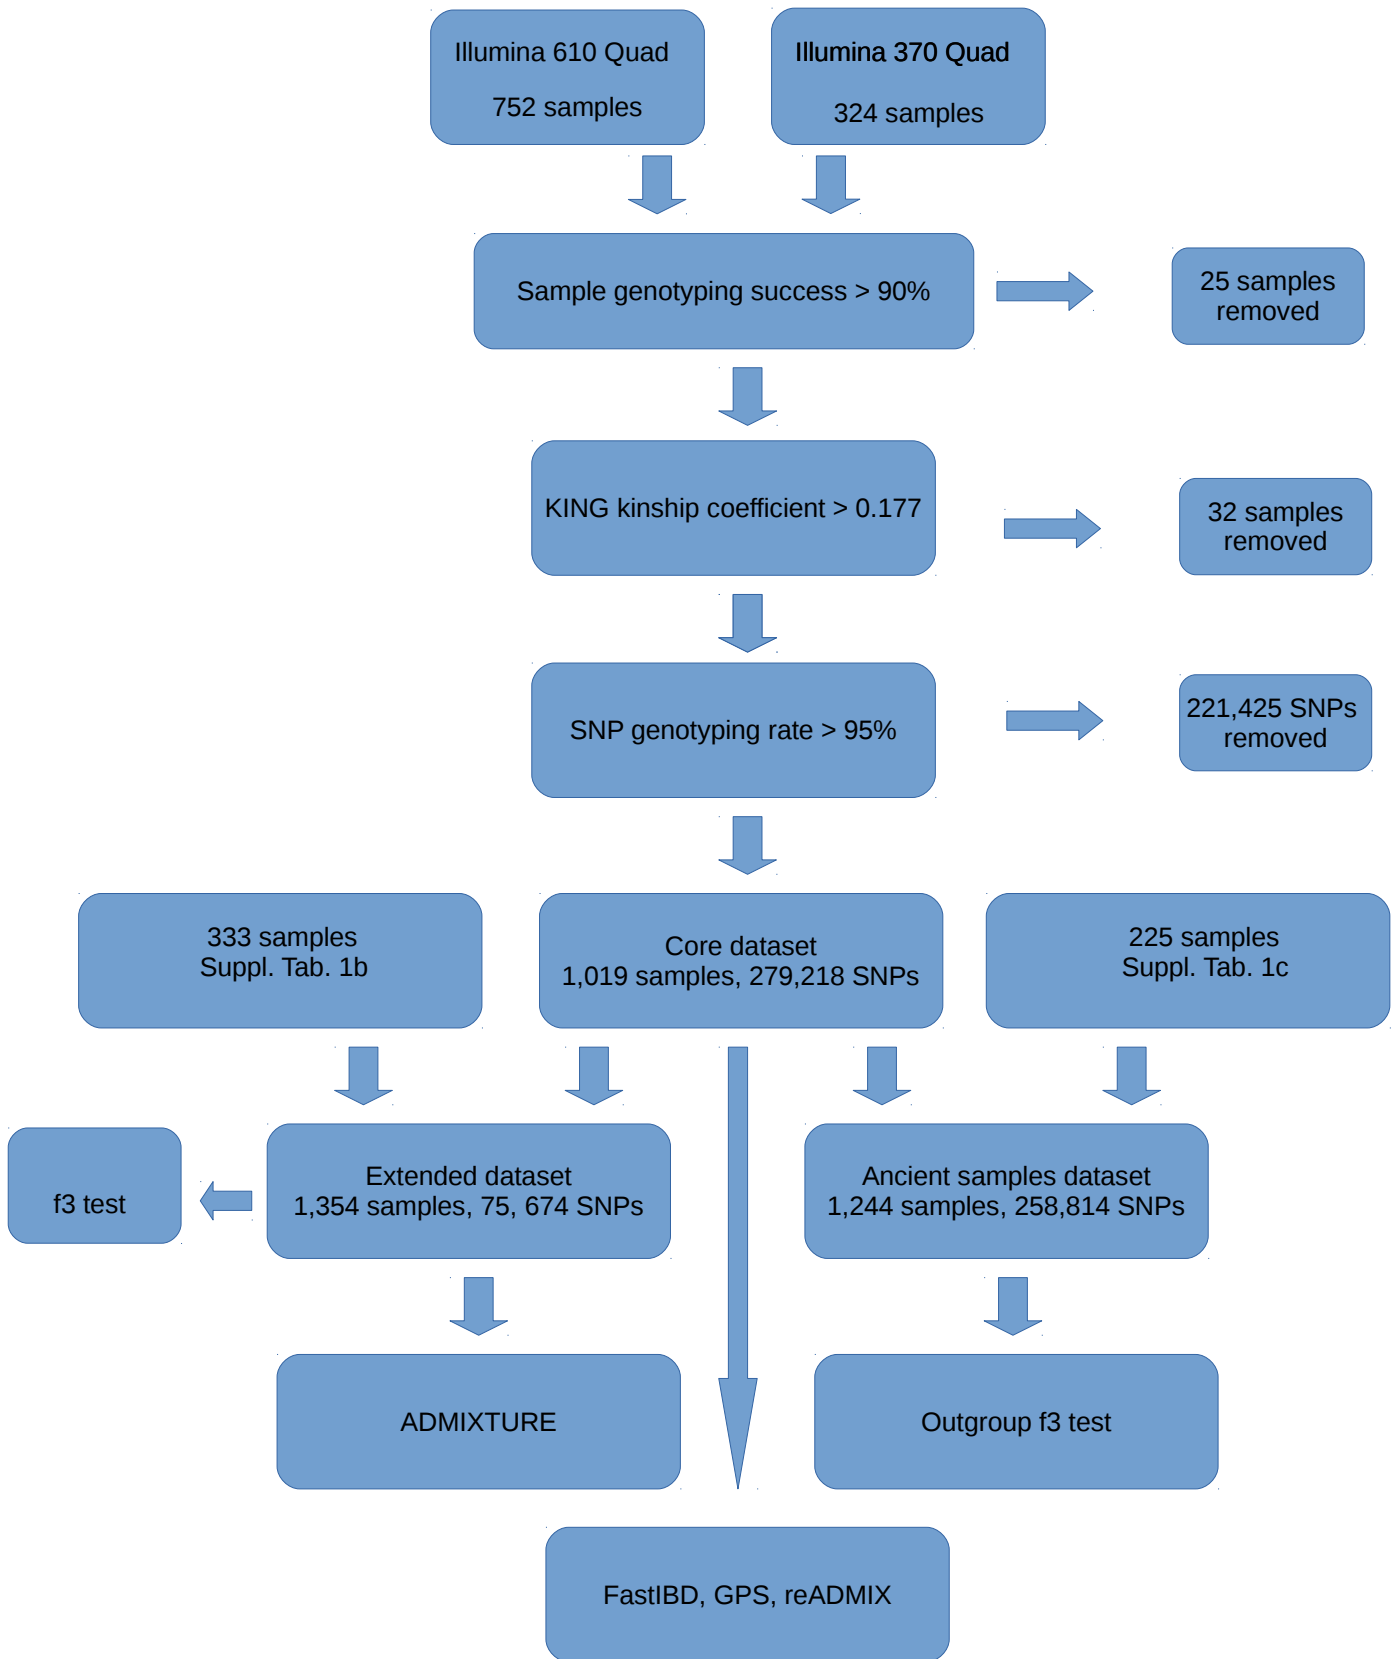

Supplement: 12863_2017_578_MOESM1_ESM.pdf [file 12863_2017_578_MOESM1_ESM.pdf]
